# Supplementary material
Source: PubMed Central journal article supplement (PMC6609966)
Supplement: DC182625SupplementaryData.pdf [file DC182625SupplementaryData.pdf]

## SUPPLEMENTARY DATA

### **Supplementary Material**

#### **Table of contents**

Study Consortia

Closed-loop devices

Required training and safety precautions during closed-loop use

Figure S1. FlorenceM system

Figure S2. Florence D2A system

Table S1. Age groups of study participants

Table S2. Characteristics of the study participants at screening

Table S3. Sensor glucose and insulin delivery during 3 weeks of closed-loop use stratified by age groups

Table S4. The coefficient of variation of insulin delivery stratified by age at diagnosis of type 1 diabetes for those aged 13 years and older

References

## SUPPLEMENTARY DATA

### **Study Consortia**

The following investigators contributed to the work:

*University of Cambridge, UK (contributed to APCam11, APhome04, Dan04 and KidsAP01):* K Dovic, M Tauschmann, C Boughton, G Musolino, H Thabit, L Bally, S Slegtenhorst, JM Allen, ME Wilinska, Y Ruan, J Hayes, N Barber, J Curtis, CL Acerini, DB Dunger, ML Evans, R Hovorka

*Central Manchester University Hospitals NHS Foundation Trust, UK (contributed to APCam11):* L Leelarathna (contributed also to APhome04), H Thabit (contributed also to APhome04), A Shaju, S Yau, L James, W Mubita, K Balakrishnan, D Donahue, W Mubita

*Leeds Children's Hospital, UK (contributed to APCam11 and KidsAP01):* J Exall, J Yong, R Forshaw, R Pad, S Heath, E Metcalfe, F Campbell

*Jaeb Center for Health Research, Tampa, FL, USA (contributed to APCam11, Dan04 and KidsAP01):* J Sibayan, C Kollman, P Cheng, RW Beck, J Lum, S Borgman, V Huegel, S Bradshaw, A Hellman, N Patibandla, C McCarthy, C Murphy, B Bugielski, B Alvarado

*Royal Hospital for Sick Children, Edinburgh, UK (contributed to APCam11):* D Elleri, M McDonald, L Bath, H Miles, D Miller, E Collett, J Baggott, K Riding, J Thomson

SUPPLEMENTARY DATA

*International Diabetes Center, Minneapolis, MN, USA (contributed to APCam11):*

RM Bergenstal, A Criego, AB Carlson, T Martens, S Beasley, M Madden, B Olson,  
J Hyatt, C Ashanti, V Mikityuk, LA Thomas, W Konerza

*Barbara Davis Center for Diabetes, University of Colorado Denver, CO, USA*

*(contributed to APCam11):* VN Shah, H Joseph, C Beatson, J Demmitt, P Joshee,  
D White

*Medical University of Graz, Graz, Austria (contributed to APhome04 and KidsAP01):*

H Kojzar, JK Mader, E Suppan, TR Pieber, EE Fröhlich-Reiterer, M Ellmerer,  
M Holzer

*DECCP, Clinique Pédiatrique /CH de Luxembourg, Luxembourg (contributed to*

*KidsAP01):* D Schaeffer, M Fichelle, U Schierloh, C. de Beaufort

*University of Leipzig, Leipzig, Germany (contributed to KidsAP01):* AG Thiele,

H Bartelt, TM Kapellen

*Medical University of Innsbruck, Innsbruck, Austria (contributed to KidsAP01):* D Abt,

D Meraner, E Binder, E Steichen, L Hackl, S Hofer

*Medical University of Vienna, Vienna, Austria (contributed to KidsAP01):* B Rami

Merhar, M Fritsch, K Nagl, S Katzenbeisser-Pawlik, M Tauschmann

SUPPLEMENTARY DATA

*Profil, Neuss, Germany (contributed to APhome04):* S Arnolds, C Benesch,  
S Dellweg, M Haase, L Heinemann, K Kuschma, M Luebker, E Przetak, K Schmitz-  
Grozs

## SUPPLEMENTARY DATA

### **Closed-loop devices**

During four free-living clinical studies, two different closed-loop prototypes with similar model predictive treat-to-target control algorithms were used:

- The FlorenceM closed-loop system (University of Cambridge, Cambridge, U.K., Figure S1) utilized a model predictive control algorithm (University of Cambridge, Cambridge, UK) residing on a smartphone (Galaxy S4, Samsung, South Korea) which communicated wirelessly with a continuous glucose monitor (Enlite 3 glucose sensor, Medtronic). Every 10 min, the control algorithm calculated an insulin infusion rate, which was set on the study pump (modified Medtronic 640G system; Medtronic, Northridge, CA). The control algorithm was initialized using pre-programmed basal insulin delivery downloaded from the study pump. Information about participant's weight and total daily insulin dose were entered at setup. The treat-to-target control algorithm aimed to achieve glucose levels between 104.4 and 131.4 mg/dL (5.8 and 7.3 mmol/L) depending on the accuracy of model-based glucose predictions. The threshold suspend feature on the modified 640G pump was turned on during closed-loop operation and allowed insulin delivery to be suspended when smartphone was not in range or not operational.
- The FlorenceD2A closed-loop system (University of Cambridge, Cambridge, U.K., Figure S2) comprised a model predictive control algorithm (University of Cambridge) residing on a smartphone (Nexus, LG), which communicated wirelessly with a continuous glucose monitoring (FreeStyle Navigator II; Abbott Diabetes Care, Alameda, CA) receiver through a purpose-made translator unit (TriTeq, Hungerford, U.K.). Every 12 min, the control algorithm calculated a new insulin infusion rate, which was automatically set on the

## SUPPLEMENTARY DATA

study insulin pump (DANA Diabecare R; Sooil, Seoul, South Korea). The control algorithm was initialized using preprogrammed basal insulin doses downloaded from the study pump. Additionally, information about the participant's weight and total daily insulin dose were entered at setup. During closed-loop operation, the algorithm adapted itself to the particular participant. The treat-to-target control algorithm aimed to achieve glucose levels between 104.4 and 131.4 mg/dL (5.8 and 7.3 mmol/L), and adjusted the actual level depending on fasting versus postprandial status and the accuracy of model-based glucose predictions.

### **Required training and safety precautions during closed-loop use**

All participants/caregivers were trained to use the study continuous glucose monitoring system device and insulin pump at the start of the run-in period.

Over a one to four week run-in phase, participants were required to use the study pump and collect a 5-12-days worth of sensor glucose to pass the compliance assessment. Data obtained during the run-in phase were used for therapy optimization as per usual clinical practice. Participants used a standard bolus calculator for all meals throughout the study. At the end of the run-in period, compliance in the use of study pump and continuous glucose monitoring were assessed.

Before closed-loop start, participants/caregivers had a training on initiation and discontinuation of the closed-loop system, switching between closed-loop and usual pump therapy, meal bolus procedure, and the use of study devices during exercise. Competency on the use of closed-loop system was assessed.

## SUPPLEMENTARY DATA

During the study period, participants were not remotely monitored or supervised, and they performed their usual unrestricted living daily activities. Participants were free to consume any meals of their choice. All the participants were provided with a telephone number for a 24-hour helpline to contact the study team in the event of study-related issues.

Participants were trained to perform a glucose sensor calibration check before breakfast and evening meals. If sensor glucose was greater than capillary fingerstick glucose by more than 54 mg/dL (3.0 mmol/L), the glucose sensor was recalibrated. If sensor glucose became unavailable or when communication between the smartphone and the study pump was interrupted, pre-programmed insulin delivery automatically restarted within 30 minutes. This limited the risk of insulin under- and over-delivery.

Safety rules limited the maximum insulin infusion and suspended insulin delivery of sensor glucose at or less than 77 mg/dL (4.3 mmol/L) or when sensor glucose was rapidly decreasing. The continuous glucose monitoring provided hypoglycemia and hyperglycemia alarms, the insulin pump provided standard alarms, and the smartphone alerted the user about aspects related to closed-loop operation such as when closed-loop insulin delivery started or stopped. In addition to this, the threshold suspend feature on 640G pump (but not on Dana pump) was turned on during closed-loop and allowed insulin delivery to be suspended if the smartphone was not in range. Resumption of insulin delivery followed the standard rules associated with threshold suspend.

## SUPPLEMENTARY DATA

### **Supplementary Figure S1. FlorenceM (used in APCam11 and KidsAP01).**

The system consists of a continuous glucose monitoring transmitter with Enlite 3 sensor (Medtronic), an insulin pump (modified 640G pump, Medtronic), and a mobile phone (Galaxy S4, Samsung) running the control algorithm (University of Cambridge). The smartphone communicated wirelessly with the modified investigational-use-only 640G pump through a proprietary translator device included in the smartphone's enclosure. Every 10 min, the control algorithm received sensor and insulin delivery data from the pump, and calculated an insulin infusion rate which was set on the study insulin pump.

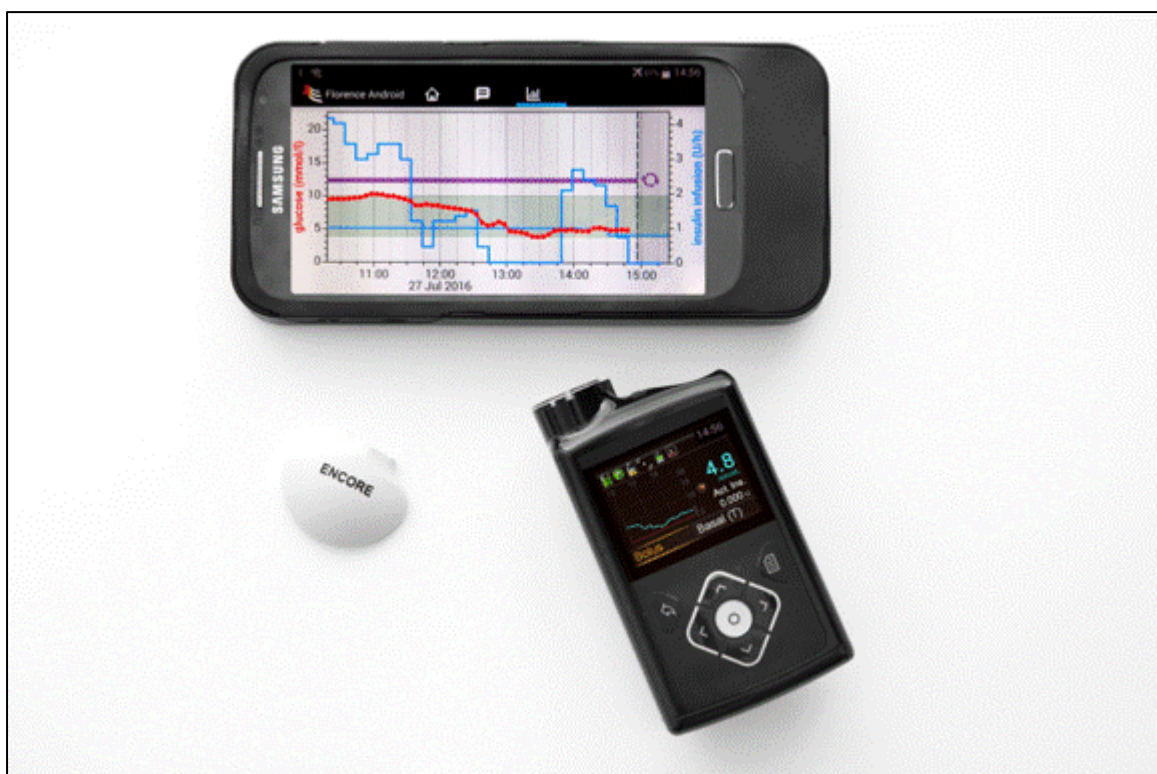



## SUPPLEMENTARY DATA

### **Supplementary Figure S2. Design of FlorenceD2A automated closed-loop system (used in APhome04 and Dan04).**

Components of Florence D2A automated closed-loop system comprising an Android phone (Galaxy S4, Samsung, South Korea) running control algorithm (University of Cambridge) and communicating wirelessly with Dana Diabecare insulin pump (Sooil, Seoul, South Korea) and translator (Triteq, Hungerford, UK) with inserted Nav2 Receiver (Abbott Diabetes Care, Alameda CA, USA).

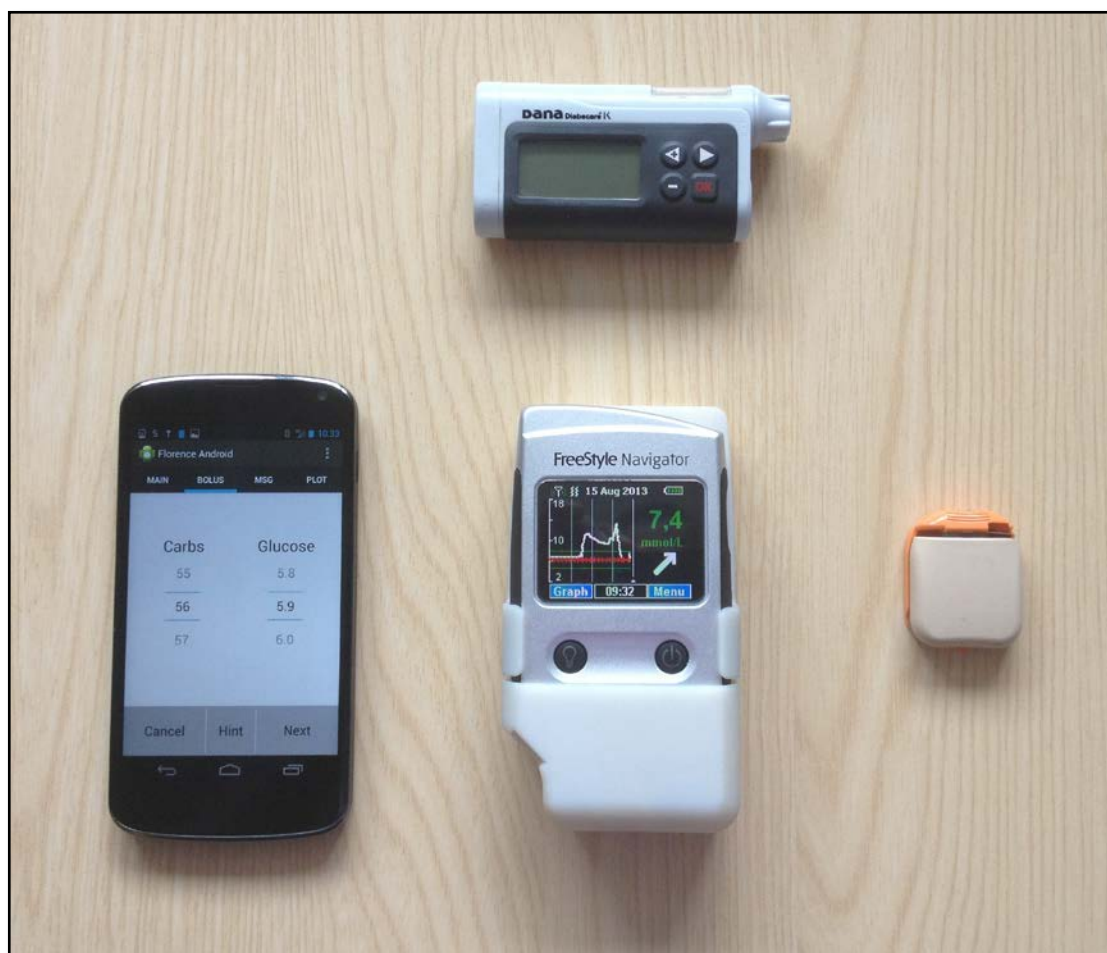

SUPPLEMENTARY DATA

**Supplementary Table S1. Age groups of study participants**

| Clinical study | Gender | Age groups            |                        |                         |                        |
|----------------|--------|-----------------------|------------------------|-------------------------|------------------------|
|                |        | ≤ 6 years<br>(n = 20) | 7–12 years<br>(n = 21) | 13–17 years<br>(n = 15) | ≥ 18 years<br>(n = 58) |
| APhome04* (1)  | female | -                     | -                      | -                       | 15                     |
|                | male   | -                     | -                      | -                       | 17                     |
| APCam11** (2)  | female | -                     | 5                      | 5                       | 12                     |
|                | male   | -                     | 6                      | 6                       | 12                     |
| Dan04* (3)     | female | -                     | 2                      | 2                       | 1                      |
|                | male   | -                     | 4                      | 2                       | 1                      |
| KidsAP01** (4) | female | 9                     | -                      | -                       | -                      |
|                | male   | 11                    | 4                      | -                       | -                      |

\* Applying FlorenceD2A closed-loop system

\*\* Applying FlorenceM closed-loop system

SUPPLEMENTARY DATA

**Supplementary Table S2. Characteristics of the study participants at screening**

|                             | Age groups            |                        |                         |                        |
|-----------------------------|-----------------------|------------------------|-------------------------|------------------------|
|                             | ≤ 6 years<br>(n = 20) | 7–12 years<br>(n = 21) | 13–17 years<br>(n = 15) | ≥ 18 years<br>(n = 58) |
| Gender (female/male)        | 9/11                  | 7/14                   | 7/8                     | 28/30                  |
| Body weight (kg)            | 18.4±0.8              | 45.9±3.0               | 70.6±4.3                | 79.0±2.2               |
| Age at enrolment (years)    | 4.6±1.5               | 10.7±1.9               | 15.3±1.5                | 37.8±10.1              |
| Age at diagnosis (years)    | 1.9±0.8               | 4.9±2.8                | 7.1±3.9                 | 16.8±10.0              |
| Time from diagnosis (years) | 2.7±1.5               | 5.8±2.7                | 8.2±3.9                 | 21.0±9.1               |

SUPPLEMENTARY DATA

**Supplementary Table S3. Sensor glucose and insulin delivery during 3 weeks of closed-loop use stratified by age groups**

|                                        | Age groups           |                        |                         |                       |
|----------------------------------------|----------------------|------------------------|-------------------------|-----------------------|
|                                        | ≤6 years<br>(n = 20) | 7-12 years<br>(n = 21) | 13-17 years<br>(n = 15) | ≥18 years<br>(n = 58) |
| Operation time of closed-loop (%)      | 84.7±5.2             | 70.9±13.5              | 73.4±18.4               | 82.8±11.5             |
| Time in range 70–180 mg/dL (%)         | 70.5±7.4             | 65.2±6.2               | 69.2±6.9                | 69.0±9.6              |
| Total insulin delivered (units/day)    | 13.0±1.1             | 40.9±5.2               | 55.8±2.9                | 48.4±2.1              |
| Total insulin delivered (units/kg/day) | 0.90±0.21            | 1.01±0.21              | 0.94±0.19               | 0.62±0.15             |
| Basal insulin delivered (units/kg/day) | 0.33±0.08            | 0.51±0.16              | 0.47±0.14               | 0.37±0.11             |
| Bolus insulin delivered (units/kg/day) | 0.56±0.15            | 0.48±0.13              | 0.46±0.10               | 0.26±0.08             |
| Nighttime insulin delivery             |                      |                        |                         |                       |
| Total insulin (units/kg/day)           | 0.07±0.02            | 0.13±0.05              | 0.13±0.04               | 0.10±0.03             |
| Basal insulin (units/kg/day)           | 0.06±0.02            | 0.12±0.05              | 0.12±0.03               | 0.09±0.03             |
| Daytime period delivery                |                      |                        |                         |                       |
| Total insulin (units/kg/day)           | 0.84±0.20            | 0.88±0.17              | 0.82±0.15               | 0.52±0.13             |
| Basal insulin (units/kg/day)           | 0.36±0.08            | 0.51±0.16              | 0.47±0.14               | 0.37±0.12             |

SUPPLEMENTARY DATA

**Supplementary Table S4. The coefficient of variation of insulin requirements stratified by age at diagnosis of type 1 diabetes for those aged 13 years and older**

|                              | Age at diagnosis groups |                        |                            |                       | P value |
|------------------------------|-------------------------|------------------------|----------------------------|-----------------------|---------|
|                              | ≤6 years<br>(n = 15)    | 7-12 years<br>(n = 23) | 13-17<br>years<br>(n = 14) | ≥18 years<br>(n = 21) |         |
| Coefficient of variation (%) |                         |                        |                            |                       |         |
| Daytime                      | 18.9±1.3                | 19.4±1.5               | 17.3±1.2                   | 19.3±1.3              | 0.729   |
| Night-time                   | 38.1±2.4                | 34.8±2.2               | 35.7±2.2                   | 36.7±1.7              | 0.739   |

## SUPPLEMENTARY DATA

### References

1. Bally L, Thabit H, Kojzar H, Mader JK, Qerimi-Hyseni J, Hartnell S, et al. Day-and-night glycaemic control with closed-loop insulin delivery versus conventional insulin pump therapy in free-living adults with well controlled type 1 diabetes: an open-label, randomised, crossover study. *Lancet Diabetes Endocrinol* 2017;5(4):261–70.
2. Tauschmann M, Thabit H, Bally L, Allen JM, Hartnell S, Wilinska ME, et al. Closed-loop insulin delivery in suboptimally controlled type 1 diabetes: a multicentre, 12-week randomised trial. *Lancet* 2018;392(10155):1321–9.
3. Tauschmann M, Allen JM, Wilinska ME, Thabit H, Acerini CL, Dunger DB, et al. Home use of day-and-night hybrid closed-loop insulin delivery in suboptimally controlled adolescents with type 1 diabetes: A 3-week, free-living, randomized crossover trial. *Diabetes Care* 2016;39(11):2019–25.
4. Tauschmann M, Allen JM, Nagl K, Fritsch M, Yong J, et al. Home use of day-and-night hybrid closed-loop insulin delivery in very young children with type 1 diabetes: A multicentre 3-week, randomised trial. *Diabetes Care* 2018; DC18-1881.R1.

## SUPPLEMENTARY DATA

*APCam11, AP@Home04, KidsAP01 and DAN04 Consortia Collaborators List*

*(First Name, Last Name)*

Klemen Dovc

Martin Tauschmann

Charlotte Boughton

Gianluca Musolino

Hood Thabit

Lia Bally

Sonja Slegtenhorst

Janet M Allen

Malgorzata E Wilinska

Yue Ruan

Josephine Hayes

Nicole Barber

Jane Curtis

Carlo L Acerini

David B Dunger

Mark L Evans

Roman Hovorka

Lalanth Leelarathna

Hood Thabit

Angel Shaju

Stefanie Yau

Linda James

Karthirani Balakrishnan

Denise Donahue

Womba Mubita

Jane Exall

James Yong

Rachel Forshaw

Rebecca Pad

Stephanie Heath

Emily Metcalfe

Fiona Campbell

Judy Sibayan

Craig Kollman

Peiyao Cheng

## SUPPLEMENTARY DATA

Roy W Beck

John Lum

Sarah Borgman

Viki Huegel

Sydnee Bradshaw

Amanda Hellman

Nanadan Patibandla

Chris McCarthy

Carlos Murphy

Brian Bugielski

Barvan Alvarado

Daniella Elleri

Morag McDonald

Louise Bath

Harriet Miles

Debbie Miller

Emily Collett

Julie Baggott

Key Riding

Jane Thomson

Richard M Bergenstal

Amy Criego

Anders B Carlson

Thomas Martens

Shannon Beasley

M Madden

Beth Olson

Jamie Hyatt

Charlotte Ashanti

Vera Mikityuk

LeeAnn Thomas

Wanda Konerza

Viral N Shah

Hal Joseph

Christie R Beatson

Jamie K Demmitt



## SUPPLEMENTARY DATA

Prakriti Joshee

Dawn White

Harald Kojzar

Julia K Mader

Elisabeth Suppan

Thomas R Pieber

Erike E Fröhlich-Reiterer

Martin Ellmerer

Manuel Holzer

Dominique Schaeffer

Muriel Fichelle

Ulrike Schierloh

Carine de Beaufort

Alena G Thiele

Heike Bartelt

Thomas M Kapellen

Daniela Abt

Dagmar Meraner

Elisabeth Binder

Elisabeth Steichen

Lukas Hackl

Sabine Hofer

Birgit Rami Merhar

Maria Fritsch

Katrin Nagl

Sonja Katzenbeisser-Pawlik

Martin Tauschmann

Sabine Arnolds

Carsten Benesch

Sibylle Dellweg

Martina Haase

Lutz Heinemann

Kirstin Kuschma

Maren Luebker

Elke Przetak

Krisztina Schmitz-Grozs
